# Supplementary material for: Physical health-related quality of life in relation to metabolic health and obesity among men and women in Germany
Source: Springer Nature journal article supplement (doi:10.1186/s12955-017-0688-7), 2017-06-10
Supplement: MOESM2 [file 12354614]

Additional File 2: Sensitivity analyses with physical functioning as dependent variable

TabS1: Linear regression models for physical functioning (SF-36 v2) according to metabolic health and obesity status

|              | N    | MHNO      | MUNO |          |          |       | MHO  |          |          |       | MUO  |          |          |       |
|--------------|------|-----------|------|----------|----------|-------|------|----------|----------|-------|------|----------|----------|-------|
|              |      |           | Beta | Lower CL | Upper CL | p     | Beta | Lower CL | Upper CL | p     | Beta | Lower CL | Upper CL | p     |
| <b>Men</b>   |      |           |      |          |          |       |      |          |          |       |      |          |          |       |
| Model1       | 3189 | Reference | -3.3 | -4.3     | -2.3     | <.001 | -2.1 | -3.3     | -0.9     | .001  | -6.0 | -7.1     | -5.0     | <.001 |
| Model2       | 3189 | Reference | -1.2 | -3.1     | -0.7     | .016  | -1.9 | 3.1      | -0.7     | .002  | -4.1 | -5.1     | -3.1     | <.001 |
| Model3       | 3030 | Reference | -0.9 | -1.8     | 0.5      | .064  | -1.6 | -2.8     | -0.5     | .007  | -3.2 | -4.2     | -2.1     | <.001 |
| <b>Women</b> |      |           |      |          |          |       |      |          |          |       |      |          |          |       |
| Model1       | 3476 | Reference | -5.7 | -6.9     | -4.5     | <.001 | -3.9 | -5.3     | -2.6     | <.001 | -9.0 | -10.1    | -7.9     | <.001 |
| Model2       | 3476 | Reference | -2.4 | -3.6     | -1.2     | <.001 | -3.4 | -4.7     | -2.1     | <.001 | -6.3 | -7.5     | -5.1     | <.001 |
| Model3       | 3326 | Reference | -1.7 | -2.9     | -0.5     | .005  | -2.1 | -3.2     | -1.1     | <.001 | -5.1 | -6.3     | -3.9     | <.001 |

CL: confidence limit, MHNO: metabolically healthy non-obese, MUNO: metabolically unhealthy non-obese, MHO: metabolically healthy obese, MUO: metabolically unhealthy obese

Model1: unadjusted

Model2: adjusted for age (squared)

Model3: additionally adjusted for educational status, smoking, physical activity, alcohol consumption, comorbidities
